# Supplementary material
Source: PubMed Central journal article supplement (PMC5288576)
Supplement: MCB.00451-16_zmb999101412s1.pdf [file MCB.00451-16_zmb999101412s1.pdf]

SUPPLEMENTAL TABLE 1. PCR primers for constructs in this study

| Primer name                             | Sequence                                     | For                      |
|-----------------------------------------|----------------------------------------------|--------------------------|
| <b>Transgene construction</b>           |                                              |                          |
| C1-s                                    | AAGCAGGCTTCACGCCTTTC                         |                          |
| C1-as(M11)                              | ACGCGTGTGAGATGCCTTACTGTGGC                   |                          |
| miniEpo frag.2                          | AACAAAAGCTGGAGCTGGCGGCCGCGGAATTCGA           |                          |
| F(Nt1)                                  | TACGC                                        |                          |
| miniEpo frag.2 R                        | GAAGGGAAATGCAGCCCAGGCTAGTCTTGAAC             |                          |
| miniEpo frag.3 F                        | GGCTGCATTTCCCTTCTCCAGCATTCTCATTT             | <i>miniEpoHE-tdT</i> and |
| miniEpo frag.3 R                        | CATCCAGCTTCCCTGGACTGTTGTACCTCG               | <i>δF3miniEpoHE-tdT</i>  |
| miniEpo frag.4 F                        | CAGGGAAGCTGGGATGACTGGAGCACACTACC             |                          |
| miniEpo frag.4 R                        | CCATGGTGGCGGGATCAAGCAGCAGGGTGGGACGT<br>TCTGG |                          |
| HE_t_AS(Sal1)                           | GCCGTCGACCACTCAGCACTTGTCTAGC                 |                          |
| Clal_HE_h S                             | TGGATCGATGGCATCAGATCTGGGAAACC                |                          |
| dF3 S                                   | CTGGGATGACTGGAGCACACT                        | <i>δF3miniEpoHE-tdT</i>  |
| dF3 AS                                  | ATGCAGCCCAGGCTAGTCTTG                        |                          |
| -8kHRE F                                | GTATCGATAGAAGCTGAGCCCGTATGAAGCTC             |                          |
| -8kHRE R                                | AGTCTAGAGGCTGGTCTGCCTCAGTAGCATC              | <i>sF2-mP-GFP</i>        |
| Ms Epo pro F                            | GACCAGCCTCTAGACTCCAGCCTTAGTTGTTT             |                          |
| Ms Epo pro R                            | CTCACCATCTCCGCGCCTAGCTGCCGGAGCTC             |                          |
| -9arm S                                 | CGAGAGGTAGAACTCAGTCC                         |                          |
| -8arm AS                                | TGAAACCCTGTCTCCAGAGG                         | Targeting vector for     |
| -7arm S                                 | CACGCGAGCACATGCTGTAG                         | <i>δF2-60k-GFP</i>       |
| -7arm AS                                | AGAGCTGACAGTTCCTGAGG                         |                          |
| -18 s                                   | AGGCAGTTGAGCCAACCTTC                         |                          |
| -17 as                                  | TACTGAAGGCTGGAAAGGGA                         | Targeting vector for     |
| -3.6 s                                  | CAGGCTCAGGTTTCATCTGAC                        | <i>δCURE-Epo/GFP</i>     |
| -2.6 as                                 | CTCCACGTGTGTGCCATGTA                         |                          |
| <b>Luciferase reporter construction</b> |                                              |                          |
| 5'HRE S                                 | AGAAGCTGAGCCCGTATGAA                         | <i>sF2-mP-Luc</i>        |
| 5'HRE AS                                | GGCTGGTCTGCCTTCAGTAG                         |                          |
| inv mu5'HRE S                           | TATGTGTTCTTGACTCTGCTCTCCTGGC                 | <i>Mu-sF2-Luc</i>        |
| inv mu5'HRE AS                          | AAAGCAGGGAGACACAACCTGCAGCTG                  |                          |

SUPPLEMENTAL TABLE 2. PCR primers for genotyping in this study.

| Primer name    | Sequence                                     | For                                                                    |
|----------------|----------------------------------------------|------------------------------------------------------------------------|
| GFP s4         | CTGAAGTTCATCTGCACCACC                        | <i>EGFP</i> gene                                                       |
| GFP as4        | GAAGTTGTACTCCAGCTTGTGC                       |                                                                        |
| int1 s         | AGAAGTGGATGCCGGTCGCTTG                       | <i>tdTomato</i> at <i>Epo</i> gene locus                               |
| EpotdT AS2     | TCACCATGGTGGCGGGATCAA                        |                                                                        |
| dCURE S        | GCTCGGAGTAAACTGAGGTC                         | Deleted CURE locus                                                     |
| dCURE AS       | GTCAGATGAACCTGAGCCTG                         |                                                                        |
| Epo-129sv/B6 S | TCTAAGGGTGTATTCTGGATGCCCC                    | B6 <i>Epo</i> gene (genome) and<br>$\delta$ CURE- <i>Epo</i> transgene |
| Epo-129sv AS   | TCGTGCTGTCTGGGGAAGAATTC                      | $\delta$ CURE- <i>Epo</i> transgene                                    |
| Epo-B6 AS      | TGGGGAAACCCCATGAGATC                         | B6 <i>Epo</i> gene (genome)                                            |
| -18.6k 40mer s | AGTCTTAAGGGGCTGGCAAGATGG<br>ATCAGTGTGTGAGCTG | Long range PCR for<br>checking transgene                               |
| HE 40mer as    | AATGGAGCCTGCTTATTGACTAGC<br>GTGGGCAGGCATTGTG | orientation of $\delta$ CURE-GFP<br>and $\delta$ CURE- <i>Epo</i>      |

SUPPLEMENTAL TABLE 3. PCR primers for copy number detection in this study.

| Primer name | Sequence                      | For                             |
|-------------|-------------------------------|---------------------------------|
| -50k s      | GTGGCCTTGCTGGTGTGTT           | 50-kb upstream region           |
| -50k as     | CCTCCAAGGCATCAGATGTG          | from <i>Epo</i> TSS             |
| -20k s      | GTGTGCTGGCATTACAGGTG          | 20-kb upstream region           |
| -20k as     | ACACACACATCCCAATGAGC          | from <i>Epo</i> TSS             |
| -18k s      | AGGCAGTTGAGCCAACCTTC          | 18-kb upstream region           |
| -18.2k as   | ACACCAAGCCATTGGAGAAAG         | from <i>Epo</i> TSS             |
| -14k s      | GAATTACAAAGATCGCCCA           | 14-kb upstream region           |
| -14k as     | CCAGAGTCGTCTGGAAAAGC          | from <i>Epo</i> TSS             |
| Cla1_HE_h S | TGGATCGATGGCATCAGATCTGGGAAACC | 3'HRE enhancer                  |
| HE as       | ATTGTGGCCTCAAGCCCAGA          | region of <i>Epo</i> gene       |
| Myb f       | GGTTAGTGTTTCAGGAGGTTGG        | Internal control ( <i>Myb</i> ) |
| Myb r       | AAATGAGTTTTGACATGTGTGTGA      |                                 |
| GATA2 f     | GCCCTGTACAACCCATTCTC          | Internal control                |
| GATA2 r     | TTGTTCCCGGCGAAGATAAT          | ( <i>Gata2</i> )                |

SUPPLEMENTAL TABLE 4. PCR primers for qRT-PCR analysis in this study.

| <b>Primer name</b> | <b>Sequence</b>         | <b>For</b>     |
|--------------------|-------------------------|----------------|
| mEpo-GFP qRT S     | GAAGACTTGCAGCGTGGACA    | <i>Epo-GFP</i> |
| mEpo-GFP qRT AS    | GGTGGATCCTAAAGCAGCAG    |                |
| mEpo f             | CATCTGCGACAGTCGAGTTCTG  | <i>Epo</i>     |
| mEpo r             | CACAACCCATCGTGACATTTTC  |                |
| Gapdh f            | GTCGTGGAGTCTACTGGTGTCTT | <i>Gapdh</i>   |
| Gapdh r            | GAGATGATGACCCTTTTGGC    |                |
| Hprt f             | GTTGGATACAGGCCAGACTTTGT | <i>Hprt</i>    |
| Hprt r             | CCACAGGACTAGAACACCTGC   |                |
